# Supplementary material
Source: MDPI journal article supplement (https://www.mdpi.com/2311-5637/8/8/411)
Supplement: s1 [file s1]

## **Supplementary Materials**

### **Statistical Optimization for Cost-effective Production of Yeast-bacterium Cell-bound Lipases Using Blended Oily Wastes and Their Potential Applications in Biodiesel Synthesis and Wastewater Bioremediation**

#### **Author names:**

Fidia Fibriana <sup>1,2</sup>, Apichat Upaichit <sup>1,3,\*</sup> and Benjamas Cheirsilp <sup>3</sup>

#### **Affiliations:**

<sup>1</sup>Molecular Biotechnology Laboratory, Faculty of Agro-Industry, Prince of Songkla University,  
Hat Yai, Songkhla 90110, Thailand

<sup>2</sup>Department of Integrated Science, Faculty of Mathematics and Natural Sciences, Universitas  
Negeri Semarang, Semarang, Central Java 50229, Indonesia

<sup>3</sup>Center of Excellence in Innovative Biotechnology for Sustainable Utilization of Bioresources,  
Faculty of Agro-Industry, Prince of Songkla University, Hat Yai, Songkhla 90110, Thailand

#### **\*Corresponding author:**

Apichat Upaichit, Molecular Biotechnology Laboratory, Faculty of Agro-Industry, Prince of  
Songkla University, Hat Yai, Songkhla 90110, Thailand. Email: apichat.u@psu.ac.th,  
upaichit@gmail.com, ORCID ID: 0000-0002-3044-3246

Number of pages: 9

Number of Figures: 0

Number of Tables: 8

**Table S1.** Characteristics of POME50, crude glycerol, waste frying oil, and molasses used in the present study.

| <b>Parameter</b>                  | <b>POME50</b> | <b>Crude<br/>Glycerol</b> | <b>Waste<br/>Frying Oil</b> | <b>Molasses</b> |
|-----------------------------------|---------------|---------------------------|-----------------------------|-----------------|
| pH                                | 3.80          | 9.57                      | 6.02                        | 6.10            |
| Glycerol (%)                      | NA            | 25.956                    | 5.66                        | NA              |
| Chemical oxygen demand (COD) (%)  | 2.977         | 97.508                    | NA                          | 0.945           |
| Total Kjeldahl nitrogen (TKN) (%) | 0.033         | 0.125                     | NA                          | 0.006           |
| Oil and grease (O&G) (%)          | 0.564         | 60.098                    | 83.751                      | 0.011           |
| Total solids (TS) (%)             | 0.647         | 0.469                     | 1.154                       | 78.742          |
| Suspended Solids (SS) (%)         | 0.493         | 0.436                     | 0.258                       | 0.106           |
| Color                             | Light brown   | Dark brown                | Dark brown                  | Black brown     |

**Table S2.** ANOVA for the factorial model of **CBLs** obtained from experimental design using PBD.

|                                                   | Sum of     |    | Mean           | F     | p-value       |             |
|---------------------------------------------------|------------|----|----------------|-------|---------------|-------------|
| Source                                            | Squares    | df | Square         | Value | Prob > F      |             |
| Model                                             | 5.636E+006 | 5  | 1.127E+006     | 6.22  | <b>0.0229</b> | significant |
| A-Waste Frying Oil                                | 1.190E+006 | 1  | 1.190E+006     | 6.57  | <b>0.0427</b> | significant |
| B-(NH <sub>4</sub> ) <sub>2</sub> SO <sub>4</sub> | 1.365E+006 | 1  | 1.365E+006     | 7.54  | <b>0.0335</b> | significant |
| C-Gum Arabic                                      | 43296.45   | 1  | 43296.45       | 0.24  | 0.6423        |             |
| D-Inoculum Size                                   | 3.741E+005 | 1  | 3.741E+005     | 2.06  | 0.2008        |             |
| E-Initial pH                                      | 2.663E+006 | 1  | 2.663E+006     | 14.70 | <b>0.0086</b> | significant |
| Residual                                          | 1.087E+006 | 6  | 1.812E+005     |       |               |             |
| Cor Total                                         | 6.723E+006 | 11 |                |       |               |             |
| Std. Dev.                                         | 425.63     |    | R-Squared      |       | 0.8383        |             |
| Mean                                              | 3091.59    |    | Adj R-Squared  |       | 0.7036        |             |
| C.V. %                                            | 13.77      |    | Pred R-Squared |       | 0.3533        |             |
| PRESS                                             | 4.348E+006 |    | Adeq Precision |       | 7.864         |             |

CBLs = +2161.11475 + -314.88758 \* A + -449.73198 \* B +120.13389 \* C +35.31252 \* D +314.07504 \* E

**Table S3.** ANOVA for a factorial model of **CBM** obtained from experimental design using PBD.

|                                                   | Sum of  |    | Mean           | F     | p-value       |             |
|---------------------------------------------------|---------|----|----------------|-------|---------------|-------------|
| Source                                            | Squares | df | Square         | Value | Prob > F      |             |
| Model                                             | 146.52  | 5  | 29.30          | 4.76  | <b>0.0419</b> | significant |
| A-Waste Frying Oil                                | 0.70    | 1  | 0.70           | 0.11  | 0.7472        |             |
| B-(NH <sub>4</sub> ) <sub>2</sub> SO <sub>4</sub> | 2.71    | 1  | 2.71           | 0.44  | 0.5318        |             |
| C-Gum Arabic                                      | 23.80   | 1  | 23.80          | 3.87  | 0.0968        |             |
| D-Inoculum Size                                   | 4.20    | 1  | 4.20           | 0.68  | 0.4403        |             |
| E-Initial pH                                      | 115.11  | 1  | 115.11         | 18.71 | <b>0.0050</b> | significant |
| Residual                                          | 36.92   | 6  | 6.15           |       |               |             |
| Cor Total                                         | 183.44  | 11 |                |       |               |             |
| Std. Dev.                                         | 2.48    |    | R-Squared      |       | 0.7987        |             |
| Mean                                              | 14.05   |    | Adj R-Squared  |       | 0.6310        |             |
| C.V. %                                            | 17.66   |    | Pred R-Squared |       | 0.1950        |             |
| PRESS                                             | 147.68  |    | Adeq Precision |       | 6.354         |             |

$$\text{CBM} = -3.24259 + 0.24167 * A + -0.63333 * B + 2.81667 * C + 0.11833 * D + 2.06481 * E$$

**Table S4.** ANOVA for a factorial model of **O&G removal** obtained from experimental design using PBD.

|                                                   | Sum of  |    | Mean           | F          | p-value       |             |
|---------------------------------------------------|---------|----|----------------|------------|---------------|-------------|
| Source                                            | Squares | df | Square         | Value      | Prob > F      |             |
| Model                                             | 1053.09 | 5  | 210.62         | 8.42       | <b>0.0110</b> | significant |
| A-Waste Frying Oil                                | 72.03   | 1  | 72.03          | 2.88       | 0.1406        |             |
| B-(NH <sub>4</sub> ) <sub>2</sub> SO <sub>4</sub> | 380.81  | 1  | 380.81         | 15.23      | <b>0.0080</b> | significant |
| C-Gum Arabic                                      | 0.083   | 1  | 0.083          | 3.332E-003 | 0.9558        |             |
| D-Inoculum Size                                   | 80.08   | 1  | 80.08          | 3.20       | 0.1238        |             |
| E-Initial pH                                      | 520.08  | 1  | 520.08         | 20.79      | <b>0.0039</b> | significant |
| Residual                                          | 150.07  | 6  | 25.01          |            |               |             |
| Cor Total                                         | 1203.17 | 11 |                |            |               |             |
| Std. Dev.                                         | 5.00    |    | R-Squared      |            | 0.8753        |             |
| Mean                                              | 44.23   |    | Adj R-Squared  |            | 0.7713        |             |
| C.V. %                                            | 11.31   |    | Pred R-Squared |            | 0.5011        |             |
| PRESS                                             | 600.29  |    | Adeq Precision |            | 8.370         |             |

$$\text{O\&G removal} = +29.33333 + -2.45000 * A + -7.51111 * B + -0.16667 * C + 0.51667 * D + 4.38889 * E$$

**Table S5.** ANOVA for a factorial model of **CBLs** obtained from experimental design using RSM-CCD.

| Source             | Sum of Squares | df | Mean Square    | F Value | p-value Prob > F   |                 |
|--------------------|----------------|----|----------------|---------|--------------------|-----------------|
| <b>Model</b>       | 1.363E+07      | 9  | 1.515E+06      | 13.47   | <b>0.0002</b>      | significant     |
| A-Waste Frying Oil | 26004.21       | 1  | 26004.21       | 0.2313  | 0.6409             |                 |
| B-Ammonium Sulfate | 5.649E+05      | 1  | 5.649E+05      | 5.02    | <b>0.0489</b>      | significant     |
| C-pH               | 6.958E+06      | 1  | 6.958E+06      | 61.88   | <b>&lt; 0.0001</b> | significant     |
| AB                 | 10813.98       | 1  | 10813.98       | 0.0962  | 0.7628             |                 |
| AC                 | 6.139E+05      | 1  | 6.139E+05      | 5.46    | <b>0.0416</b>      | significant     |
| BC                 | 8.482E+05      | 1  | 8.482E+05      | 7.54    | <b>0.0206</b>      | significant     |
| A <sup>2</sup>     | 99376.60       | 1  | 99376.60       | 0.8838  | 0.3693             |                 |
| B <sup>2</sup>     | 1.105E+06      | 1  | 1.105E+06      | 9.83    | <b>0.0106</b>      | significant     |
| C <sup>2</sup>     | 3.871E+06      | 1  | 3.871E+06      | 34.42   | <b>0.0002</b>      | significant     |
| Residual           | 1.124E+06      | 10 | 1.124E+05      |         |                    |                 |
| <b>Lack of Fit</b> | 8.590E+05      | 5  | 1.718E+05      | 3.24    | 0.1117             | not significant |
| Pure Error         | 2.655E+05      | 5  | 53101.28       |         |                    |                 |
| Cor Total          | 1.476E+07      | 19 |                |         |                    |                 |
| Std. Dev.          | 335.33         |    | R-Squared      | 0.9238  |                    |                 |
| Mean               | 3782.25        |    | Adj R-Squared  | 0.8552  |                    |                 |
| C.V. %             | 8.87           |    | Pred R-Squared | 0.5319  |                    |                 |
| PRESS              | 6.908E+06      |    | Adeq Precision | 13.9218 |                    |                 |

$$\text{CBLs} = -8430.42 + 1618.87 * A + 56.8879 * B + 3201.78 * C + -49.0215 * AB + -184.676 * AC + 289.442 * BC + -83.0406 * A^2 + -492.227 * B^2 + -230.336 * C^2$$

**Table S6.** ANOVA for a factorial model of **CBM** obtained from experimental design using RSM-CCD.

| Source                                            | Sum of Squares | df | Mean Square | F Value | p-value Prob > F   |                 |
|---------------------------------------------------|----------------|----|-------------|---------|--------------------|-----------------|
| <b>Model</b>                                      | 629.53         | 9  | 69.95       | 10.85   | <b>0.0004</b>      | significant     |
| A-Waste Frying Oil                                | 2.14           | 1  | 2.14        | 0.3322  | 0.5771             |                 |
| B-(NH <sub>4</sub> ) <sub>2</sub> SO <sub>4</sub> | 40.79          | 1  | 40.79       | 6.33    | <b>0.0306</b>      | significant     |
| C-pH                                              | 347.86         | 1  | 347.86      | 53.94   | <b>&lt; 0.0001</b> | significant     |
| AB                                                | 2.40           | 1  | 2.40        | 0.3721  | 0.5555             |                 |
| AC                                                | 29.37          | 1  | 29.37       | 4.55    | 0.0586             |                 |
| BC                                                | 34.48          | 1  | 34.48       | 5.35    | <b>0.0433</b>      | significant     |
| A <sup>2</sup>                                    | 0.0536         | 1  | 0.0536      | 0.0083  | 0.9292             |                 |
| B <sup>2</sup>                                    | 63.55          | 1  | 63.55       | 9.85    | <b>0.0105</b>      | significant     |
| C <sup>2</sup>                                    | 120.82         | 1  | 120.82      | 18.74   | <b>0.0015</b>      | significant     |
| Residual                                          | 64.49          | 10 | 6.45        |         |                    |                 |
| <b>Lack of Fit</b>                                | 49.89          | 5  | 9.98        | 3.42    | 0.1017             | not significant |
| Pure Error                                        | 14.59          | 5  | 2.92        |         |                    |                 |
| Cor Total                                         | 694.01         | 19 |             |         |                    |                 |

  

|           |        |                |         |
|-----------|--------|----------------|---------|
| Std. Dev. | 2.54   | R-Squared      | 0.9071  |
| Mean      | 17.00  | Adj R-Squared  | 0.8235  |
| C.V. %    | 14.94  | Pred R-Squared | 0.4209  |
| PRESS     | 401.93 | Adeq Precision | 12.6208 |

$$\text{CBM} = -57.5457 + 7.96846 * A + 3.67754 * B + 19.0455 * C + -0.73024 * AB + -1.27738 * AC + 1.8455 * BC + 0.0609913 * A^2 + -3.73308 * B^2 + -1.28688 * C^2$$

**Table S7.** ANOVA for a factorial model of **O&G removal** obtained from experimental design using RSM-CCD.

| Source                                            | Sum of Squares | df | Mean Square | F Value | p-value Prob > F   |                 |
|---------------------------------------------------|----------------|----|-------------|---------|--------------------|-----------------|
| <b>Model</b>                                      | 439.06         | 9  | 48.78       | 10.77   | <b>0.0005</b>      | significant     |
| A-Waste Frying Oil                                | 5.63           | 1  | 5.63        | 1.24    | 0.2910             |                 |
| B-(NH <sub>4</sub> ) <sub>2</sub> SO <sub>4</sub> | 30.58          | 1  | 30.58       | 6.75    | <b>0.0265</b>      | significant     |
| C-pH                                              | 289.05         | 1  | 289.05      | 63.83   | <b>&lt; 0.0001</b> | significant     |
| AB                                                | 0.31           | 1  | 0.31        | 0.069   | 0.7977             |                 |
| AC                                                | 32.02          | 1  | 32.02       | 7.07    | <b>0.0239</b>      | significant     |
| BC                                                | 22.58          | 1  | 22.58       | 4.99    | <b>0.0496</b>      | significant     |
| A <sup>2</sup>                                    | 0.33           | 1  | 0.33        | 0.072   | 0.7942             |                 |
| B <sup>2</sup>                                    | 27.00          | 1  | 27.00       | 5.96    | <b>0.0347</b>      | significant     |
| C <sup>2</sup>                                    | 37.41          | 1  | 37.41       | 8.26    | <b>0.0166</b>      | significant     |
| Residual                                          | 45.28          | 10 | 4.53        |         |                    |                 |
| <b>Lack of Fit</b>                                | 34.68          | 5  | 6.94        | 3.27    | 0.1097             | not significant |
| Pure Error                                        | 10.60          | 5  | 2.12        |         |                    |                 |
| Cor Total                                         | 484.34         | 19 |             |         |                    |                 |

  

|           |        |                |        |
|-----------|--------|----------------|--------|
| Std. Dev. | 2.13   | R-Squared      | 0.9065 |
| Mean      | 52.55  | Adj R-Squared  | 0.8224 |
| C.V. %    | 4.05   | Pred R-Squared | 0.4156 |
| PRESS     | 283.04 | Adeq Precision | 12.294 |

$$\text{O\&G removal} = -6.14215 + 9.20921 * A + 0.65642 * B + 13.07802 * C + -0.26409 * AB + -1.33380 * AC + 1.49348 * BC + -0.15020 * A^2 + -2.43320 * B^2 + -0.71604 * C^2$$



**Table S8.** Fatty acid composition of palm oil, waste frying oil, and oil extracted from POME.

| <b>Fatty acids</b>       | <b>Refined palm oil</b> | <b>Waste frying oil</b> | <b>Extracted oil</b> |
|--------------------------|-------------------------|-------------------------|----------------------|
|                          | <b>(%)</b>              | <b>(%)</b>              | <b>from POME</b>     |
|                          |                         |                         | <b>(%)</b>           |
| Myristic acid (C14:0)    | 0.63                    | 0.41                    | 0.24                 |
| Palmitic acid (C16:0)    | 40.61                   | 29.69                   | 33.01                |
| Palmitoleic acid (C16:1) | -                       | 0.28                    | 0.15                 |
| Stearic acid (C18:0)     | 4.87                    | 3.08                    | 1.53                 |
| Oleic acid (C18:1)       | 34.88                   | 28.56                   | 18.35                |
| Linoleic acid (C18:2)    | 10.14                   | 20.98                   | 5.93                 |
| Linolenic acid (C18:3)   | 0.42                    | 1.65                    | 0.31                 |
| Eicosanoic acid (C20:0)  | 0.12                    | 13.16                   | 3.84                 |
| Paulinic acid (C20:1)    | -                       | -                       | 2.93                 |
| Docosanoic acid (C22:0)  | -                       | 11.83                   | 0.07                 |
| Total SFA                | 46.23                   | 46.34                   | 38.69                |
| Total MUFA               | 34.88                   | 28.84                   | 21.43                |
| Total PUFA               | 10.56                   | 22.63                   | 6.24                 |

SFA = saturated fatty acids, MUFA = monounsaturated fatty acids, PUFA= polyunsaturated fatty acids
